1 **Nonclassical monocytes are prone to migrate into tumor in diffuse large B-cell**  
2 **lymphoma**

3  
4 Simon Le Gallou,<sup>#,1,2</sup> Faustine Lhomme,<sup>#,1,3</sup> Jonathan M. Irish,<sup>3,4</sup> Anna Mingam,<sup>1</sup>  
5 Celine Pangault,<sup>1,2</sup> Celine Monvoisin,<sup>2</sup> Juliette Ferrant,<sup>2</sup> Imane Azzaoui,<sup>1</sup> Delphine  
6 Rossille,<sup>1,2</sup> Krimo Bouabdallah,<sup>5</sup> Gandhi Damaj,<sup>6</sup> Guillaume Cartron,<sup>7</sup> Pascal  
7 Godmer,<sup>8</sup> Steven Le Gouill,<sup>9</sup> René-Olivier Casasnovas,<sup>10</sup> Thierry Jo Molina,<sup>11</sup> Roch  
8 Houot,<sup>2,12</sup> Thierry Lamy,<sup>2,12</sup> Karin Tarte,<sup>1,2</sup> Thierry Fest,<sup>1,2</sup> and Mikael Roussel<sup>1,2</sup>

9  
10 <sup>1</sup> Centre Hospitalier Universitaire de Rennes, Pôle Biologie, Rennes, France;

11 <sup>2</sup> Institut national de la santé et de la recherche médicale, Unité Mixte de Recherche  
12 U1236, Université Rennes 1, Etablissement Français du Sang Bretagne, Rennes,  
13 France;

14 <sup>3</sup> Department of Cell and Developmental Biology, Vanderbilt University School of  
15 Medicine, Nashville, TN, USA;

16 <sup>4</sup> Department of Pathology, Microbiology and Immunology, Vanderbilt University  
17 School of Medicine, Nashville, TN, USA;

18 <sup>5</sup> Centre Hospitalier Universitaire de Bordeaux, Service d'Hématologie Clinique,  
19 Bordeaux, France;

20 <sup>6</sup> Centre Hospitalier Universitaire de Caen, Service d'Hématologie Clinique, Caen,  
21 France;

22 <sup>7</sup> Centre Hospitalier Universitaire de Montpellier, Service d'Hématologie Clinique,  
23 Montpellier, France;

24 <sup>8</sup> Centre Hospitalier de Bretagne Atlantique, Unité d'Hématologie Clinique, Vannes,  
25 France;

26 <sup>9</sup> Centre Hospitalier Universitaire de Nantes, Service d'Hématologie Clinique,  
27 INSERM CCRCINA Nantes-Angers, NeXT Université de Nantes, Nantes, France;

28 <sup>10</sup> Centre Hospitalier Universitaire de Dijon, Service d'Hématologie Clinique, Dijon,  
29 France

30 <sup>11</sup> APHP, Necker, Service d'Anatomopathologie, Sorbonne Université, Paris, France

31 <sup>12</sup> Centre Hospitalier Universitaire de Rennes, Service d'Hématologie Clinique,  
32 Rennes, France

33  
34 <sup>#</sup>S.L.G. and F.L. contributed equally to this study.

35  
36 Correspondence to Mikael Roussel, Laboratoire Hématologie, CHU Pontchaillou, 2  
37 rue Le Guilloux, 35033 Rennes, France; e-mail: [mikael.roussel@chu-rennes.fr](mailto:mikael.roussel@chu-rennes.fr).  
38 Tel.:+33 299 289 142

39  
40 Running title: Nonclassical monocytes in DLBCL

41  
42 Word count in abstract: 136

43 Word count in text: 3603

44 Figure count: 5

45 Table count: 1

46 Reference count: 43

47 **Key points**

- 48 • Nonclassical monocytes are prone to migrate to DLBCL tumor
- 49 • High count of circulating nonclassical monocytes is an independent adverse
- 50 event in DLBCL

51

52 **Abstract**

53 Absolute count of circulating monocytes has been proposed as an

54 independent prognostic factor in diffuse large B-cell lymphoma (DLBCL). However,

55 monocyte nomenclature includes various subsets with pro-, anti-inflammatory, or

56 suppressive functions, and their clinical relevance in DLBCL has been poorly

57 explored. Herein, we broadly assessed circulating monocyte heterogeneity in 91

58 DLBCL patients. Classical- (cMO, CD14<sup>pos</sup> CD16<sup>neg</sup>) and intermediate- (iMO, CD14<sup>pos</sup>

59 CD16<sup>pos</sup>) monocytes accumulated in DLBCL peripheral blood and exhibited an

60 inflammatory phenotype. On the opposite, nonclassical monocytes (ncMO, CD14<sup>low</sup>

61 CD16<sup>pos</sup>) were decreased in peripheral blood. Tumor-conditioned monocytes

62 presented similarities with ncMO phenotype from DLBCL and were prone to migrate

63 in response to CCL3, CCL5, and CXCL12, and presented similarities with DLBCL-

64 infiltrated myeloid cells, as defined by mass cytometry. Finally, we demonstrated the

65 adverse value of an accumulation of nonclassical monocytes in 2 independent

66 cohorts of DLBCL.

67

## 68 Introduction

69 Circulating monocytes are classified by their CD14 and CD16 expression as  
70 classical- (cMO, CD14<sup>pos</sup> CD16<sup>neg</sup>), intermediate- (iMO, CD14<sup>pos</sup> CD16<sup>pos</sup>), and  
71 nonclassical- monocytes (ncMO, CD14<sup>low</sup> CD16<sup>pos</sup>).<sup>1</sup> In addition, Slan expression (6-  
72 Sulfo LacNac, which is a carbohydrate modification of P-selectin glycoprotein ligand-  
73 1 [PSGL-1]), allows the sub-classification of ncMO Slan<sup>pos</sup> (CD14<sup>low</sup> CD16<sup>pos</sup> Slan<sup>pos</sup>)  
74 and ncMO Slan<sup>neg</sup> (CD14<sup>low</sup> CD16<sup>pos</sup> Slan<sup>neg</sup>).<sup>2,3</sup> Lastly monocytic myeloid derived  
75 suppressor cells (M-MDSC, CD14<sup>pos</sup> HLA-DR<sup>low</sup>) found in acute or chronic  
76 inflammatory context, including cancers, are defined by an impairment of T- and NK-  
77 effector functions.<sup>4</sup> This nomenclature reflects pro-inflammatory, anti-inflammatory, or  
78 suppressive functions described for monocytes.<sup>5,6</sup>

79 In diffuse large B-cell lymphoma (DLBCL), tumor microenvironment (TME),  
80 myeloid cells are supportive of the neoplastic process.<sup>7-10</sup> In blood from DLBCL  
81 patients, an increase in circulating monocytes is a marker of adverse prognosis.<sup>11-15</sup>  
82 However, so far monocytes were considered as a whole, and few studies analyzed  
83 the monocyte subsets and their clinical relevance even if their intrinsic functions are  
84 known to be different. Among monocyte subsets: i) Slan<sup>pos</sup> monocytes were  
85 increased and displayed high rituximab mediated antibody-dependent cellular  
86 cytotoxicity;<sup>16</sup> ii) an increase in CD16<sup>pos</sup> or CD11b<sup>pos</sup>CX3CR1<sup>pos</sup> monocytes predicted  
87 poor progression free- and overall- survival;<sup>17,18</sup> iii) CD14<sup>pos</sup>CD163<sup>pos</sup>PD-L1<sup>pos</sup>  
88 monocytes were increased;<sup>19</sup> and finally iv) functional M-MDSCs were enriched in  
89 peripheral blood and predicted poor event-free survival.<sup>20-22</sup> In DLBCL tumor, the  
90 myeloid compartment heterogeneity was recently approached by high dimensional  
91 analysis revealing distinct macrophage phenotype across lymphoma subtypes.<sup>23</sup>

## Nonclassical monocytes in DLBCL

92 In light with the observation that various monocyte subsets are involved in the  
93 biology of DLBCL, we investigated the canonical cMO, iMO, ncMO Slan<sup>pos</sup>, and  
94 ncMO Slan<sup>neg</sup> subsets in two large cohorts of patients. We quantified these subsets,  
95 analyzed their phenotype and functions as well as the clinical relevance of these  
96 cells. We found here that in DLBCL, ncMO are prone to migrate into tissues and that  
97 their increase in peripheral blood is associated with an adverse prognosis.

98

### 99 **Methods**

#### 100 **Samples**

101 A cohort of 91 DLBCL patients at diagnosis from the BMS-LyTRANS clinical  
102 trial (ClinicalTrials.gov Identifier: NCT01287923) was used in this study. Clinical  
103 characteristics of DLBCL patients enrolled in this training cohort are listed in Table 1.  
104 Patients with previous corticosteroid treatment were excluded from this study. As  
105 controls, age-matched healthy donors (HD, n = 49), follicular lymphomas (n = 9),  
106 mantle cell lymphomas (n = 9), chronic lymphocytic leukemias (n = 11), and marginal  
107 zone lymphomas (n = 10) were included. Part of these samples (DLBCL and HD)  
108 were used in a previous work.<sup>22</sup> Prognosis scores were validated in a second cohort  
109 of 155 DLBCL patients from the recently published GAINED trial (ClinicalTrials.gov  
110 Identifier: NCT01659099).<sup>24</sup> Clinical characteristics of DLBCL patients enrolled in this  
111 validation cohort are listed in Table 1. Finally, we reanalyzed CyTOF data (Flow  
112 Repository FR-FCM-Z2CA, already published by our group)<sup>23</sup> from myeloid cells from  
113 DLBCL tumors (n = 7). The research protocol was conducted under French legal  
114 guidelines and fulfilled the requirements of the local institutional ethics committee.

115

#### 116 **Fluorescent flow cytometry analysis**

## Nonclassical monocytes in DLBCL

117 Blood samples were collected on heparin tubes. Flow cytometry analysis of M-  
118 MDSCs, cMO, iMO, and ncMO were performed on whole blood (300  $\mu$ L/tube) with  
119 the antibody panel shown Table S1 and the gating strategy defined Figure S1.  
120 Absolute counts were obtained by using Flow-Count beads (Beckman Coulter, Brea,  
121 CA). An erythrocytes lysis (Uti-Lyse Dako, Carpinteria, CA) was performed before  
122 analysis by flow cytometry (Navios, Beckman Coulter). Analyses were performed  
123 using Kaluza software (Beckman Coulter).

124

### 125 **In vitro culture**

126 Monocytes were obtained from PBMCs by elutriation before cryopreservation  
127 (plate-forme DTC; CIC Biotherapie, Nantes, France). Monocytes were thawed and  
128 resuspended at  $4 \times 10^6$  cells/mL in RPMI 1640 (Invitrogen, Carlsband, CA, USA)  
129 supplemented with 10 % FCS and antibiotics (Invitrogen) and then diluted at  $2 \times 10^6$   
130 cells/mL by adding, as control, the OCI-Ly medium (IMDM supplemented with 10%  
131 human AB serum, 1% penicillin–streptomycin and 50  $\mu$ M of  $\beta$ -Mercaptoethanol, or  
132 OCI-Ly3 or OCI-Ly19 supernatant. Two mL of cell suspension were seeded in a 6-  
133 well plate during 4 days before mass cytometry analysis or migration assay.

134

### 135 **Mass cytometry analysis**

136 Cell labeling and mass-cytometry analysis were performed as previously  
137 described.<sup>25–27</sup> Briefly, cells were incubated with 25  $\mu$ M cisplatin (Fluidigm San  
138 Francisco, CA, USA). Then,  $5 \times 10^6$  cells were washed in PBS (HyClone Laboratories,  
139 Logan, UT, USA) containing 1 % BSA (Thermo Fisher Scientific) and stained in 100  
140  $\mu$ L PBS and BSA 1 %-containing Antibody cocktail. Cells were stained for 30 min at  
141 RT with the antibodies (Table S2) Cells were washed twice in PBS - BSA 1 % before

142 fixation in 1.6 % PFA, and permeabilization with methanol (Electron Microscopy  
143 Sciences, Hatfield, PA, USA). After incubating overnight at -20°C in MeOH, cells  
144 were washed twice with PBS -BSA 1 % and stained 20 min with iridium intercalator  
145 (Fluidigm, Sunnyvale, CA, US). Finally, cells were washed twice with PBS and twice  
146 with diH<sub>2</sub>O before acquisition a CyTOF 2.0 mass cytometer (Fluidigm).

147

#### 148 **Data processing and analysis**

149 Data analysis was performed using the workflow previously developed.<sup>23</sup>  
150 Briefly, after acquisition, intrafile signal drift was normalized and .fcs files were  
151 obtained using CyTOF software. To diminish batch effects, all files were normalized  
152 on EQ Beads (Fluidigm) using the premissa R package  
153 (<https://github.com/ParkerICI/premissa>). Raw median intensity values were  
154 transformed to a hyperbolic arcsine (arcsinh) scale with a cofactor of 5, then analysis  
155 was performed using Cytobank software (Beckman Coulter, Brea, CA, USA). Each  
156 file was pre-gated for single, viable cells. These populations were exported as  
157 separate flow cytometry standard files and analyzed using Cyclospore.<sup>28,29</sup> The  
158 HSNE (Hierarchical Stochastic Neighbor Embedding) was performed to identify cell  
159 types. Then, hierarchical clustering of mean marker intensity on each cluster  
160 representing a phenotypically distinct myeloid cell population was performed.

161

#### 162 **Migration assay**

163 At day 4 of monocyte culture with OCI-Ly3, or OCI-Ly19 supernatant, or  
164 control culture medium, cells were collected and washed twice in PBS before  
165 starvation during 1 hour (37°C) at 10<sup>6</sup> cells/mL in RPMI 1% HSA. Cells were washed  
166 once and 100 µL of cells at 10<sup>6</sup> cells/mL were added to the upper compartment of

## Nonclassical monocytes in DLBCL

167 Transwell chambers with 5  $\mu$ M pore filters. The lower chamber contained CCL2 (R&D  
168 Systems, 30 ng/ml), CCL3 (R&D Systems, 20 ng/ml), CCL5 (R&D Systems, 30  
169 ng/ml), CCL22 (R&D Systems, 20 ng/ml), CXCL5 (R&D Systems, 20 ng/ml), CXCL12  
170 (R&D Systems, 20 ng/ml), or RPMI 1640 1% HSA as control. Cells in the lower  
171 chamber were collected after 5h and the absolute number of viable (DAPI negative)  
172 monocytes was quantified by flow cytometry using FlowCount beads.

173

### 174 **Cell sorting**

175 cMO (CD19<sup>neg</sup> CD3<sup>neg</sup> CD335<sup>neg</sup> CD45<sup>pos</sup> CD14<sup>high</sup> CD16<sup>neg</sup>), iMO (CD19<sup>neg</sup>  
176 CD3<sup>neg</sup> CD335<sup>neg</sup> CD45<sup>pos</sup> CD14<sup>high</sup> CD16<sup>pos</sup>), ncMO Slan<sup>pos</sup> (CD19<sup>neg</sup> CD3<sup>neg</sup>  
177 CD335<sup>neg</sup> CD45<sup>pos</sup> CD14<sup>low</sup> CD16<sup>pos</sup> Slan<sup>pos</sup>), and ncMO Slan<sup>neg</sup> (CD19<sup>neg</sup> CD3<sup>neg</sup>  
178 CD335<sup>neg</sup> CD45<sup>pos</sup> CD14<sup>low</sup> CD16<sup>pos</sup> Slan<sup>neg</sup>) were sorted from thawed PBMC of  
179 DLBCL patients and HD using an ARIA II (FACSAria, BD Biosciences).

180

### 181 **Quantitative real-time PCR**

182 Total RNA was extracted using Nucleospin® RNA XS kit (Macherey-Nagel,  
183 Duren, Germany). cDNA was then generated using Fluidigm Reverse Transcription  
184 Master Mix (Fluidigm). The qPCR were performed in triplicate using 96.96 Dynamic  
185 Array™ IFCs and the BioMark™ HD System from Fluidigm. For each sample, the  
186 mean CT value for the gene of interest was calculated, normalized to the geometric  
187 mean value of the 2 housekeeping genes (*CDKN1B*, and *ELF1*) (Table S3), and  
188 compared to the median value obtained from the reference population (HD cMO or  
189 iMO for Figure 2, and DLBCL ncMO for Figure 3) using the 2-ddCT method. Results  
190 were expressed as the ratio of sample mean to reference mean for each gene.

191

192 **Statistical analysis**

193 Statistical analyses were performed with GraphPad Prism 8.4.3 software  
194 (GraphPad Software, San Diego, CA, USA) using Spearman correlation, Wilcoxon,  
195 Mann-Whitney, Ordinary one-way ANOVA with Tukey's multiple comparisons test,  
196 and Fishers's exact tests as appropriate. Optimal thresholds were defined with the  
197 *maxstat* package, log-rank tests were performed with the *survminer* package, cox  
198 model for univariate and multivariate analysis were performed with the *survival*  
199 package. Analyses were generated with R v4.0.3, using Rstudio v1.3.1093.

200

201 **Data sharing statement**

202 For original data, please contact the corresponding author.

203

204 **Results**

205 **cMO and iMO are increased in DLBCL**

206 We have previously shown that M-MDSCs accumulated in DLBCL peripheral  
207 blood.<sup>22</sup> However, this increase accounts for only a part of the total monocyte  
208 accumulation suggesting that additional monocyte subsets are also increased in  
209 DLBCL samples (Figure 1A). We quantified the absolute count of the 4 circulating  
210 monocyte subsets M-MDSC, cMO, iMO, and ncMO. M-MDSC, cMO, and iMO were  
211 increased in DLBCL when compared to HDs ( $P < .05$ , median:  $5.75 \times 10^6$  cells/L vs  
212  $2.8 \times 10^6$  cells/L,  $348.8 \times 10^6$  cells/L vs  $274.1 \times 10^6$  cells/L, and  $34.4 \times 10^6$  cells/L vs  
213  $26.1 \times 10^6$  cells/L; respectively). Conversely, ncMO were significantly decreased in  
214 DLBCL when compared to HD ( $P < .0001$ , median:  $17.1 \times 10^6$  cells/L vs  $36.1 \times 10^6$   
215 cells/L; Figure 1B). Noteworthy, whereas the increase of cMO and iMO was also  
216 found in other B cell lymphomas, this decrease in ncMO was specific of DLBCL



## Nonclassical monocytes in DLBCL

217 (Figure S2). Then, we wondered in which monocyte subset M-MDSCs were included.  
218 Of note M-MDSC count was correlated with total monocyte ( $R = .70$ ,  $P < .0001$ ), cMO  
219 ( $R = .55$ ,  $P < .0001$ ), and iMO ( $R = .74$ ,  $P < .0001$ ) but was not correlated with ncMO  
220 (Figure 1C) No correlation were observed between MO subsets in HD samples (data  
221 not shown). Regarding CD14 and CD16 expression, M-MDSCs were essentially  
222 aligned with the cMO phenotype and to a lesser extent to iMO (Figure 1D).  
223 Altogether, these results confirmed that in addition to MDSCs, cMO and iMO were  
224 also involved in the monocyte increase observed in DLBCL patients.

225

### 226 **DLBCL cMO and iMO share a common inflammatory phenotype**

227 To further identify the immune properties of monocyte subsets, we sorted cMO  
228 and iMO from DLBCL ( $n=7$ ) and HD ( $n=4$ ) samples. Gene expression was assessed  
229 by high throughput qPCR on 71 genes involved in myeloid biology<sup>22</sup> (Table S3 and  
230 Figure S3). Of note, 6 cMO and 5 iMO out of 7 DLBCL were clustered (Figure 2A and  
231 Figure S3). DLBCL cMO and DLBCL iMO were significantly enriched for *FCGR3A*,  
232 *CD36*, *FCGR1A*, *CYBB*, *AIM2*, *STAT6*, *FCGR2A*, *CCR2*, *NLRC4*, *S100A8*, and  
233 *CD14* genes, when compared to the corresponding subsets in HDs ( $P < .05$ ,  
234  $|\log_2FC| > 1$ ) (Figure 2B). In addition, *S100A9* and *CD163* were also increased in  
235 DLBCL cMO, whereas *CD33* and *ITGAM* were enriched only in DLBCL iMO. For both  
236 subsets, *SLC7A11*, *CD274*, and *CXCL1* were expressed at lower levels in DLBCLs  
237 (Figure 2B). Biological processes enriched in DLBCL cMO and iMO included  
238 apoptosis, production of ROS, immune response, and phagocytosis (Figure 2C). By  
239 flow cytometry, we showed that cMO and iMO from DLBCL displayed a higher  
240 expression of CD64 and CCR2 ( $P < .05$ ), without variation in HLA-DR and CD163

241 (Figure 2D). Altogether, these results suggested that, in DLBCL, cMO and iMO share  
242 a common deregulated inflammatory phenotype.

243

244 **DLBCL ncMO are decreased in peripheral blood and exhibit an inflammatory-**  
245 **and tolerogenic- phenotype**

246 We then focused on ncMO in DLBCL samples and found that both subsets of  
247 ncMO (ncMO Slan<sup>pos</sup> and ncMO Slan<sup>neg</sup>) were decreased in DLBCLs when compared  
248 to HDs (ncMO Slan<sup>pos</sup> median at  $3.3 \times 10^6$  cells/L vs  $9.1 \times 10^6$  cells/L [ $P < .001$ ] and  
249 ncMO Slan<sup>neg</sup> median at  $19 \times 10^6$  cells/L vs  $23.7 \times 10^6$  cells/L [ $P < .05$ ], respectively)  
250 (Figure 3A). No increase of apoptosis was detected in ncMO from DLBCL patients  
251 (data not shown). Then, sorted ncMO Slan<sup>pos</sup> and ncMO Slan<sup>neg</sup> from DLBCL and HD  
252 samples were analyzed by high-throughput Q-PCR (Figure S4). To explore the  
253 similarities between ncMO Slan<sup>pos</sup>, ncMO Slan<sup>neg</sup>, iMO, and cMO, we performed a  
254 hierarchical clustering on the DLBCL samples. For 6 out of 7 patients, cMO and iMO  
255 were separated from ncMO independently of Slan expression (Figure 3B and Figure  
256 S5). In addition, ncMO exhibited tolerogenic genes (*PDCD1LG2*, *IL10*, *IDO*, *CD274*,  
257 *AGER*, *TNFAIP6*) (Figure S5), most of these genes were not expressed in HD ncMO  
258 (Figure S6). In DLBCL, cMO and iMO in one hand and ncMO Slan<sup>pos</sup> and ncMO  
259 Slan<sup>neg</sup> in the other hand shared similar gene expression (Figure 2A and Figure S5),  
260 thus we compared the gene expression between ncMO, irrespectively of the Slan  
261 status, and both cMO and iMO. DLBCL ncMO were enriched for both inflammatory  
262 (*CXCL10*, *AIM2*, *IL12A*) and tolerogenic (*PDCD1LG2*, *IL10*, *IDO*, *CD274*, *AGER*)  
263 genes ( $P < .05$ ,  $|\log_2FC| > 1$ ) compared to cMO and iMO (Figure 3C). Biological  
264 processes involved by genes enriched in ncMO from DLBCL patients were growth of  
265 tumor, inhibition of cells, and chemotaxis (Figure 3D and Figure S7).

266

267 **Tumor conditioned monocytes give rise to ncMO-like prone to migrate in**  
268 **response to CCL3, CCL5, and CXCL12**

269 In order to evaluate how tumor B cells contribute directly to the phenotype of  
270 DLBCL monocytes, we cultured monocytes from HD with supernatants from the  
271 DLBCL cell lines OCI-Ly3 and OCI-Ly19. After coculture, we analyzed the monocyte  
272 phenotype by mass cytometry.<sup>23,25</sup> After dimension reduction and clustering (Figure  
273 4A), we noticed an increased expression of Slan, CD64, CD163, CD86, CD206, and  
274 CD16 and a decreased expression of CCR2 in clusters from tumor-conditioned  
275 monocytes when compared to non-conditioned counterparts. We concluded that  
276 tumor conditioned monocytes acquired a ncMO-like phenotype. Then we wondered if  
277 these cells were prone to migrate into tissue. Tumor-conditioned monocytes  
278 demonstrated an increase in *in vitro* migration in response to CCL3 (46.4 and 18.2  
279 fold for OCI-Ly3 and OCI-Ly19, respectively), CCL5 (78.4 and 63.4 fold for OCI-Ly3  
280 and OCI-Ly19, respectively), and CxCL12 (131 and 77.4 fold for OCI-Ly3 and OCI-  
281 Ly19, respectively), when compared to non-conditioned monocytes (Figure 4B). Then  
282 we compared the phenotype obtained by mass cytometry of tumor-conditioned  
283 monocytes (Mo OCI-Ly) to the phenotype of myeloid cells from DLBCL tumors,  
284 already published by our group (Flow Repository FR-FCM-Z2CA).<sup>23</sup> Interestingly, a  
285 subset of myeloid cells from DLBCL showed similarities with tumor-conditioned  
286 monocytes, in particular with the common high expression of CD64, CD11c, CD32,  
287 S100A9, and HLA-DR (Figure 4C).

288

289 **High level of circulating ncMO is correlated with an adverse prognosis in**  
290 **DLBCL**

## Nonclassical monocytes in DLBCL

291 Then, we evaluated the prognosis value of cMO, iMO, and ncMO in DLBCL.  
292 We used i) the proportion of ncMO to other monocytes (ratio ncMO to sum of cMO  
293 and iMO) and ii) the absolute count of circulating cMO, iMO, and ncMO. Analysis was  
294 performed on 52 patients for which clinical data were available. cMO and iMO were  
295 not associated with prognosis (data not shown). By contrast, patients with high  
296 proportion of ncMO and high absolute count of circulating ncMO were associated  
297 with a lower event-free survival probability ( $P = .043$  and  $P = .0061$ , respectively)  
298 using thresholds (ratio at 0.06 and ncMO at  $20.58 \times 10^6$  cells/L) defined with the  
299 maxstat package (Figure 5A, Figure S8A and Figure S8B).

300 To validate the prognosis value of ncMO obtained on this training cohort, we  
301 analyzed by flow cytometry the proportion of monocyte subsets in an independent  
302 cohort of 155 DLBCL samples from the recently published GAINED trial  
303 (NCT01659099).<sup>24</sup> With the previously calculated thresholds, high proportion of  
304 ncMO and high absolute count of ncMO was associated with a lower overall survival  
305 ( $P = .017$  and  $P = .011$ , respectively) (Figure 5A and Figure S8B). A univariate  
306 analysis on the validation cohort showed that Ann Arbor Stage III-IV, ECOG status  
307  $>1$ , elevated LDH, PET4 positivity, and increase in circulating ncMO were associated  
308 with lower OS (Table S4). In a multivariable analysis Ann Arbor Stage III-IV, PET4  
309 positivity, increase in circulating ncMO remained statistically significant (Table S4).

310 We previously demonstrated the accumulation of M-MDSC in DLBCL<sup>22</sup> and  
311 since no phenotypic overlap existed between M-MDSC and ncMO (Figure 1D), we  
312 wondered if patients' characteristics were different between M-MDSC<sup>high</sup> and  
313 ncMO<sup>high</sup> DLBCLs. Both M-MDSC and ncMO were infrequently increased together  
314 (11 cases out of 155 [7.1 %]); ncMO were increased alone in 51 cases (32.9 %), and  
315 M-MDSC were increased alone in 28 cases (18.1 %) (Figure 5B). Interestingly,

## Nonclassical monocytes in DLBCL

316 ncMO<sup>high</sup> and M-MDSC<sup>high</sup> patients corresponded to different types of patients. In  
317 particular when compared to ncMO<sup>low</sup>, ncMO<sup>high</sup> were enriched in ABC DLBCL  
318 subtypes (37.5 vs 15.9 % [P = .014]) and in older patients (median age at 50 vs 46  
319 years [P = .044]). On the other hand, when compared to ncMO<sup>high</sup>, M-MDSC<sup>high</sup>  
320 patients were younger (median age at 42 vs 50 years [P = .0027]) and had higher  
321 levels of soluble PD-L1 (sPD-L1 at 1849 vs 1142 pg/mL [P = .008]) (Figure 5B).

322

### 323 Discussion

324 Although the prognostic relevance of total monocyte count has been described  
325 in large cohorts of DLBCL in the last decade,<sup>11–15</sup> few studies evaluated which  
326 particular monocyte subset was involved. In a previous work, we have shown an  
327 accumulation of M-MDSC (CD14<sup>pos</sup> HLA-DR<sup>low</sup>) in peripheral blood from DLBCL  
328 patients.<sup>22</sup> Because M-MDSCs were not responsible for the whole increase in  
329 monocytes in our cohort, we explored cMO, iMO, and ncMO subsets. We  
330 demonstrated an increase in cMOs and iMOs in DLBCL, as in other lymphomas  
331 subtypes tested (CLL, MCL, MZL, and FL). In DLBCL, these MO subsets shared an  
332 inflammatory phenotype. By contrast, ncMOs were decreased in peripheral blood  
333 only in DLBCLs when compared to HDs or other B cell lymphomas. Interestingly,  
334 high number of circulating ncMO was an adverse prognosis in 2 independent cohorts  
335 of DLBCL patients. Finally, we found that tumor-conditioned monocytes shared a  
336 common phenotype with ncMOs and were prone to migrate in response to  
337 chemokines.

338 Surprisingly cMO and iMO from DLBCL shown common deregulated pathways  
339 with an enrichment for *FCGR3A*, *CD36*, *FCGR1A*, *CYBB*, *AIM2*, *STAT6*, *FCGR2A*,  
340 *CCR2*, *NLRC4*, *S100A8*, and *CD14*. These genes are broadly expressed in cMO in

## Nonclassical monocytes in DLBCL

341 healthy samples<sup>2,5</sup> and our results suggest that iMO and cMO are tumor-educated  
342 and polarized to a common inflammatory phenotype in DLBCL. In our study we found  
343 a decrease in both circulating ncMO Slan<sup>neg</sup> and ncMO Slan<sup>pos</sup> when compared to  
344 HDs, whereas an increase in ncMO Slan<sup>pos</sup> was previously described in DLBCL.<sup>16</sup>  
345 This discrepancy might be explained by differences in patient characteristics between  
346 both studies. In particular patients were older in the study from Verni et coll (63.9  
347 years [range: 31-86] vs 50 years [range:18-83]) and at higher grade (clinical stage III-  
348 IV at 80.5% vs 70% and IPI  $\geq$ 3 at 55.6% vs 40%).<sup>16</sup> In CLL, an increase of ncMO  
349 correlates with high cytogenetic risk (deletion 11q, 17p, or trisomy 12).<sup>30</sup> In our study,  
350 an increase of the proportion of circulating ncMO was a worse prognosis factor in 2  
351 independent cohorts. This was previously suggested on 45 DLBCLs where the  
352 decrease of CD16<sup>pos</sup> monocyte to CD16<sup>neg</sup> monocyte ratio predicted poor prognosis,  
353 however conclusions were limited because iMO and cMO were analyzed conjointly.<sup>17</sup>  
354 ncMO abundance also predicted patient survival of pediatric and adult B acute  
355 lymphoblastic leukemia.<sup>31</sup> Interestingly, in a pre-clinical mouse model of B cell  
356 lymphomas, Ly6C<sup>low</sup> monocytes (corresponding to the ncMO)<sup>32</sup> accumulated and  
357 showed high levels of immunosuppressive genes (*PD-L1*, *PD-L2*, *Arg1*, *IDO1*, and  
358 *CD163*) associated with suppression of T cell proliferation.<sup>33</sup> In colorectal cancer  
359 Ly6C<sup>low</sup> monocyte mediated immunosuppression by IL-10 production.<sup>34</sup> Finally, ncMO  
360 were increased in gastric cancer.<sup>35</sup> Conversely, in a lung cancer model, LyC<sup>low</sup>  
361 monocytes recruited NK cells to prevent cancer metastasis.<sup>36</sup> In DLBCL, we and  
362 others focused on total monocyte and on M-MDSC and few attention was given to  
363 other monocyte subsets. Interestingly, ncMO and M-MDSC have non-overlapping  
364 phenotype regarding HLA-DR expression and these cells infrequently correlated in  
365 patients suggesting different mechanism of myelopoiesis dysregulation. Patients that

## Nonclassical monocytes in DLBCL

366 were enriched in circulating MDSCs were younger and presented high amount of  
367 sPD-L1, a pejorative marker.<sup>37</sup> Interestingly, release of PD-L1 was a mechanism of  
368 immune suppression suggested in DLBCL.<sup>22</sup>

369 Beside immunosuppression, gene enriched in ncMO were related to  
370 chemotaxis. Circulating ncMO are diminished in DLBCL, on the contrary there were  
371 enriched in other B cell lymphomas or solid tumor,<sup>38</sup> thus we hypothesized that these  
372 cells might migrate into tissue to contribute to the tumor-associated macrophage  
373 compartment. CCL2, CCL3, CCL5, CCL22, CXCL5, and CXCL12 are involved in  
374 monocyte, MDSC, and macrophage recruitment into the TME.<sup>39</sup> Tumor-conditioned  
375 monocyte shown an increased migration in response to CXCL5, CXCL12, CCL3, and  
376 CCL5. Consistently, in our previous study, *CXCL5* expression was increased in  
377 peripheral blood from DLBCL compared to healthy donors and its expression was  
378 related to a worse event-free survival.<sup>22</sup> CCL3 is also increased in DLBCL when  
379 compared to HD and high level correlates with shorter survival.<sup>40,41</sup>

380 In DLBCL, TAM are heterogenous,<sup>23</sup> in particular a Slan<sup>pos</sup> macrophage subset  
381 is involved in rituximab mediated antibody dependent cellular cytotoxicity.<sup>16</sup> In  
382 agreement, we found in DLBCL a compartment of cells expressing Slan at high level  
383 with CD14, CD32, and HLA-DR. However, DLBCL clusters that correlated with  
384 tumor-conditioned monocytes highly expressed CD64, CD36, and S100A9 and thus  
385 presented similarities with IFN $\gamma$  *in-vitro* polarized macrophages.<sup>25</sup> Few studies  
386 compared paired samples from circulating and in situ myeloid cells. In melanoma  
387 patient, myeloid cells obtained from the blood, but not from the tumor, were  
388 suppressive.<sup>42</sup> In lung adenocarcinoma, macrophages phenotype detected in tumor  
389 were not present in peripheral blood.<sup>43</sup> Currently, there is no model of lymphoma that  
390 allows tracking the myeloid cell from the blood to the tissues. Future studies entailing

## Nonclassical monocytes in DLBCL

391 a prospective collection of paired blood and tumor samples are needed to confirm  
392 these observations on ncMO and to put in perspective the myeloid compartment with  
393 the T/NK compartment. Also, it would be interested to test the prognosis value in  
394 cohort of DLBCL treated with other immunotherapies and correlate with responders  
395 vs non-responders.

396 Our study as some limitations, in particular the lack of extensive functional  
397 studies due to the low number of circulating ncMO in DLBCL samples precluding  
398 large cell sorting. Taken together, our results show that ncMO are involved in the  
399 DLBCL physiopathology and impact the prognosis of the disease. Given the current  
400 and our previous data, we propose that cMO and iMO are reflecting the inflammatory  
401 status in DLBCL, whereas M-MDSC are responsible of a systemic suppressive  
402 response, and ncMO are involved in suppressive response and migration to tissue.

403



404 **Acknowledgements**

405 This work was supported by a fellowship from the Nuovo-Soldati Foundation  
406 (Switzerland) (M.R.), from the Ligue contre le Cancer (M.R.), from the COmite de la  
407 REcherche Clinique et Translationnelle, CHU of Rennes (F.L.), from the Association  
408 pour le Développement de l'Hématologie Oncologie (F.L.), from the National Institute  
409 of Cancer (INCa Recherche Translationnelle 2010) (T.F.), and from the Groupe  
410 Ouest-Est des Leucémies et des Autres Maladies du Sang (GOELAMS) (T.F.). We  
411 are indebted to the clinicians of the BREHAT network and to the French Blood Bank  
412 (EFS) of Rennes for providing samples. The authors acknowledge the Centre de  
413 Ressources Biologiques (CRB-santé) of Rennes (BB-0033-00056) for managing  
414 samples.

415

416 **Authorship contributions**

417 S.L.Ga., F.L., A.M., C.M., and I.A. designed and performed experiments, analyzed  
418 data; J.M.I., D.R., J.F., and T.J.M. analyzed data; C.P., K.B., G.D., G.C., P.G.,  
419 S.L.Go., R.O.C., R.H., and T.L. provided samples; T.F. and K.T. raised the funds and  
420 analyzed data; M.R. designed and supervised research, analyzed data, and wrote  
421 the paper. All authors revised the manuscript.

422

423 **Disclosure of conflicts of interest**

424 All authors declare no conflicts of interest.

425 **References**

426

- 427 1. Ziegler-Heitbrock L, Ancuta P, Crowe S, et al. Nomenclature of monocytes and dendritic  
428 cells in blood. *Blood*. 2010;116(16):e74-80.
- 429 2. Cros J, Cagnard N, Woollard K, et al. Human CD14<sup>dim</sup> Monocytes Patrol and Sense  
430 Nucleic Acids and Viruses via TLR7 and TLR8 Receptors. *Immunity*. 2010;33(3):375–386.
- 431 3. Ahmad F, Döbel T, Schmitz M, Schäkel K. Current Concepts on 6-sulfo LacNAc  
432 Expressing Monocytes (slanMo). *Front Immunol*. 2019;10:948.
- 433 4. Bronte V, Brandau S, Chen S, et al. Recommendations for myeloid-derived suppressor cell  
434 nomenclature and characterization standards. *Nature Communications*. 2016;7:12150.
- 435 5. Wong KL, Tai JJ-Y, Wong W-C, et al. Gene expression profiling reveals the defining  
436 features of the classical, intermediate, and nonclassical human monocyte subsets. *Blood*.  
437 2011;118(5):e16-31.
- 438 6. Guilliams M, Mildner A, Yona S. Developmental and Functional Heterogeneity of  
439 Monocytes. *Immunity*. 2018;49(4):595–613.
- 440 7. Lenz G, Wright G, Dave SS, et al. Stromal gene signatures in large-B-cell lymphomas. *The*  
441 *New England journal of medicine*. 2008;359(22):2313–2323.
- 442 8. Riihijarvi S, Fiskvik I, Taskinen M, et al. Prognostic influence of macrophages in patients  
443 with diffuse large B-cell lymphoma: a correlative study from a Nordic phase II trial.  
444 *Haematologica*. 2015;100(2):238–245.
- 445 9. Scott DW, Gascoyne RD. The tumour microenvironment in B cell lymphomas. *Nature*  
446 *Reviews Cancer*. 2014;14(8):517–534.
- 447 10. Nam SJ, Kim S, Kwon D, et al. Prognostic implications of tumor-infiltrating  
448 macrophages, M2 macrophages, regulatory T-cells, and indoleamine 2,3-dioxygenase-positive  
449 cells in primary diffuse large B-cell lymphoma of the central nervous system.  
450 *Oncoimmunology*. 2018;7(7):1–39.
- 451 11. Tadmor T, Bari A, Sacchi S, et al. Monocyte count at diagnosis is a prognostic parameter  
452 in diffuse large B-cell lymphoma: results from a large multicenter study involving 1191  
453 patients in the pre- and post-rituximab era. *Haematologica*. 2014;99(1):125–130.
- 454 12. Nitta H, Terui Y, Yokoyama M, et al. Absolute peripheral monocyte count at diagnosis  
455 predicts central nervous system relapse in diffuse large B-cell lymphoma. *Haematologica*.  
456 2015;100(1):87–90.
- 457 13. Troppan K, Deutsch A, Gerger A, et al. The derived neutrophil to lymphocyte ratio is an  
458 independent prognostic factor in patients with diffuse large B-cell lymphoma. *British Journal*  
459 *of Cancer*. 2014;110(2):369–374.

## Nonclassical monocytes in DLBCL

- 460 14. Wilcox RA, Ristow K, Habermann TM, et al. The absolute monocyte and lymphocyte  
461 prognostic score predicts survival and identifies high-risk patients in diffuse large-B-cell  
462 lymphoma. *Leukemia*. 2011;25(9):1502–1509.
- 463 15. Maurer MJ, Jais J-P, Ghesquières H, et al. Personalized risk prediction for event-free  
464 survival at 24 months in patients with diffuse large B-cell lymphoma. *American journal of*  
465 *hematology*. 2016;91(2):179–184.
- 466 16. Vermi W, Micheletti A, Finotti G, et al. slan+ Monocytes and Macrophages Mediate  
467 CD20-Dependent B-cell Lymphoma Elimination via ADCC and ADCP. *Cancer Research*.  
468 2018;78(13):3544–3559.
- 469 17. Han X, Ruan J, Zhang W, et al. Prognostic implication of leucocyte subpopulations in  
470 diffuse large B-cell lymphoma. *Oncotarget*. 2017;8(29):47790–47800.
- 471 18. Yhim H-Y, Kim J-A, Ko S-H, et al. The prognostic significance of CD11b+CX3CR1+  
472 monocytes in patients with newly diagnosed diffuse large B-cell lymphoma. *Oncotarget*.  
473 2017;8(54):92289–92299.
- 474 19. Vari F, Arpon D, Keane C, et al. Immune evasion via PD-1/PD-L1 on NK cells and  
475 monocyte/macrophages is more prominent in Hodgkin lymphoma than DLBCL. *Blood*.  
476 2018;131(16):1809–1819.
- 477 20. Lin Y, Gustafson MP, Bulur PA, et al. Immunosuppressive CD14+HLA-DR<sup>low</sup>/  
478 monocytes in B-cell non-Hodgkin lymphoma. *Blood*. 2011;117(3):872–881.
- 479 21. Xiu B, Lin Y, Grote DM, et al. IL-10 induces the development of immunosuppressive  
480 CD14(+)<sup>HLA-DR</sup>(<sup>low</sup>/<sup>-</sup>) monocytes in B-cell non-Hodgkin lymphoma. *Blood Cancer*  
481 *Journal*. 2015;5(7):e328.
- 482 22. Azzaoui I, Uhel F, Rossille D, et al. T-cell defect in diffuse large B-cell lymphomas  
483 involves expansion of myeloid-derived suppressor cells. *Blood*. 2016;128(8):1081–1092.
- 484 23. Roussel M, Lhomme F, Roe CE, et al. Mass cytometry defines distinct immune profile in  
485 germinal center B-cell lymphomas. *Cancer Immunology, Immunotherapy*. 2020;69(3):407–  
486 420.
- 487 24. Gouill SL, Ghesquieres H, Obéric L, et al. Obinutuzumab versus Rituximab in young  
488 patients with advanced DLBCL, a PET-guided and randomized phase 3 study by LYSA.  
489 *Blood*. 2020;1–35.
- 490 25. Roussel M, Ferrell PB, Greenplate AR, et al. Mass cytometry deep phenotyping of human  
491 mononuclear phagocytes and myeloid-derived suppressor cells from human blood and bone  
492 marrow. *Journal of Leukocyte Biology*. 2017;102(2):437–447.
- 493 26. Roussel M, Bartkowiak T, Irish JM. Picturing Polarized Myeloid Phagocytes and  
494 Regulatory Cells by Mass Cytometry. *Methods in molecular biology*. 2019;1989(2018):217–  
495 226.

## Nonclassical monocytes in DLBCL

- 496 27. Ferrant J, Lhomme F, Gallou SL, Irish JM, Roussel M. Circulating Myeloid Regulatory  
497 Cells: Promising Biomarkers in B-Cell Lymphomas. *Front Immunol*. 2021;11:623993.
- 498 28. Höllt T, Pezzotti N, Unen V van, et al. Cytosplore: Interactive Immune Cell Phenotyping  
499 for Large Single-Cell Datasets. *Comput Graph Forum*. 2016;35(3):171–180.
- 500 29. Unen V van, Höllt T, Pezzotti N, et al. Visual analysis of mass cytometry data by  
501 hierarchical stochastic neighbour embedding reveals rare cell types. *Nat Commun*.  
502 2017;8(1):1740.
- 503 30. Maffei R, Bulgarelli J, Fiorcari S, et al. The monocytic population in chronic lymphocytic  
504 leukemia shows altered composition and deregulation of genes involved in phagocytosis and  
505 inflammation. *Haematologica*. 2013;98(7):1115–1123.
- 506 31. Witkowski MT, Dolgalev I, Evensen NA, et al. Extensive Remodeling of the Immune  
507 Microenvironment in B Cell Acute Lymphoblastic Leukemia. *Cancer cell*. 2020;37(6):867-  
508 882.e12.
- 509 32. Ginhoux F, Jung S. Monocytes and macrophages: developmental pathways and tissue  
510 homeostasis. *Nature Reviews Immunology*. 2014;14(6):392–404.
- 511 33. McKee SJ, Tuong ZK, Kobayashi T, et al. B cell lymphoma progression promotes the  
512 accumulation of circulating Ly6Clo monocytes with immunosuppressive activity.  
513 *Oncoimmunology*. 2018;7(2):e1393599.
- 514 34. Jung K, Heishi T, Khan OF, et al. Ly6Clo monocytes drive immunosuppression and  
515 confer resistance to anti-VEGFR2 cancer therapy. *The Journal of clinical investigation*.  
516 2017;127(8):3039–3051.
- 517 35. Eljaszewicz A, Jankowski M, Gackowska L, et al. Gastric cancer increase the percentage  
518 of intermediate (CD14<sup>++</sup>CD16<sup>+</sup>) and nonclassical (CD14<sup>+</sup>CD16<sup>+</sup>) monocytes. *Clinical*  
519 *Immunology*. 2012;4:355–361.
- 520 36. Hanna RN, Cekic C, Sag D, et al. Patrolling monocytes control tumor metastasis to the  
521 lung. *Science*. 2015;350(6263):985–990.
- 522 37. Rossille D, Azzaoui I, Feldman AL, et al. Soluble programmed death-ligand 1 as a  
523 prognostic biomarker for overall survival in patients with diffuse large B-cell lymphoma: a  
524 replication study and combined analysis of 508 patients. *Leukemia*. 2017;31(4):988–991.
- 525 38. Cassetta L, Fragkogianni S, Sims AH, et al. Human Tumor-Associated Macrophage and  
526 Monocyte Transcriptional Landscapes Reveal Cancer-Specific Reprogramming, Biomarkers,  
527 and Therapeutic Targets. *Cancer Cell*. 2019;35(4):588-602.e10.
- 528 39. Nagarsheth N, Wicha MS, Zou W. Chemokines in the cancer microenvironment and their  
529 relevance in cancer immunotherapy. *Nature Reviews Immunology*. 2017;17(9):559–572.
- 530 40. Charbonneau B, Maurer MJ, Ansell SM, et al. Pretreatment circulating serum cytokines  
531 associated with follicular and diffuse large B-cell lymphoma: A clinic-based case-control  
532 study. *Cytokine*. 2012;60(3):882–889.

## Nonclassical monocytes in DLBCL

- 533 41. Takahashi K, Sivina M, Hoellenriegel J, et al. CCL3 and CCL4 are biomarkers for B cell  
534 receptor pathway activation and prognostic serum markers in diffuse large B cell lymphoma.  
535 *Brit J Haematol.* 2015;171(5):726–735.
- 536 42. Gros A, Turcotte S, Wunderlich JR, et al. Myeloid Cells Obtained from the Blood but Not  
537 from the Tumor Can Suppress T-cell Proliferation in Patients with Melanoma. *Clinical*  
538 *Cancer Research.* 2012;18(19):5212–5223.
- 539 43. Lavin Y, Kobayashi S, Leader A, et al. Innate Immune Landscape in Early Lung  
540 Adenocarcinoma by Paired Single-Cell Analyses. *Cell.* 2017;169(4):750-757.e15.
- 541
- 542

543 **Table 1: Patient's characteristics at baseline**

|                                                                    | Healthy donors<br>(n = 49) | BMS-LyTRANS<br>Training cohort<br>(n = 91) | GAINED <sup>24</sup><br>Validation cohort<br>(n=155) |
|--------------------------------------------------------------------|----------------------------|--------------------------------------------|------------------------------------------------------|
| <b>Average age, years (range)</b>                                  | 52.9 (25-66)               | 55.7 (18-83)                               | 44.9 (19-60)                                         |
| <b>Male, n (%)</b>                                                 | 30 (61.2%)                 | 56 (61.5%)                                 | 86 (55.5%)                                           |
| <b>Female, n (%)</b>                                               | 19 (38.8%)                 | 35 (38.5%)                                 | 69 (44.5%)                                           |
| <b>aalPI, n (%)</b>                                                |                            |                                            |                                                      |
| 0 to 1                                                             | NA                         | 46 (59%)*                                  | 68 (43.9%)                                           |
| 2                                                                  | NA                         | 28 (35.9%)*                                | 71 (45.8%)                                           |
| 3                                                                  | NA                         | 4 (5.1%)*                                  | 16 (10.3%)                                           |
| <b>Cell of origin, n (%)</b>                                       |                            |                                            |                                                      |
| GCB (Hans <sup>&amp;</sup> or Nanostring <sup>@</sup> )            | NA                         | 30 (54.5%)*, <sup>&amp;</sup>              | 83 (74.8%)*, <sup>@</sup>                            |
| Non-GCB (Hans <sup>&amp;</sup> ) or ABC (Nanostring <sup>@</sup> ) | NA                         | 25 (45.5%)*, <sup>&amp;</sup>              | 28 (25.2%)*, <sup>@</sup>                            |
| Unclassified <sup>@</sup>                                          | NA                         | NA                                         | 9 <sup>@</sup>                                       |
| Insufficient material                                              | NA                         | 36                                         | 35                                                   |
| <b>Chemotherapy, n</b>                                             |                            |                                            |                                                      |
| Rituximab CHOP                                                     | NA                         | 69                                         | 37                                                   |
| Rituximab ACVBP                                                    | NA                         | 0                                          | 39                                                   |
| Obinutuzumab CHOP                                                  | NA                         | 6                                          | 40                                                   |
| Obinutuzumab ACVBP                                                 | NA                         | 0                                          | 38                                                   |
| Other treatment                                                    | NA                         | 3                                          | 0                                                    |
| Unknown or not treated                                             | NA                         | 13                                         | 1                                                    |

544 aalPI: age adjusted International prognostic index; GCB: germinal center B cell; ABC:

545 activated B cell \*: percentage among cases with known data; &: defined by Hans

546 algorithm; @: defined by nanostring analysis. CHOP: cyclophosphamide,

547 doxorubicine, vincristine, and prednisone; ACVBP: doxorubicine, prednisone,

548 cyclophosphamide, vindesine, and bleomycine; NA: not applicable.

549

550 **Figure Legends**

551 **Figure 1: cMO and iMO are increased in peripheral blood from DLBCL.** (A)

552 Monocyte absolute counts in HD (n = 43) and DLBCL (n = 69). For the 23 DLBCL  
553 samples with monocyte above  $528 \times 10^6$  monocytes/L (corresponding to the 90<sup>th</sup>  
554 percentile of HD), proportion of M-MDSC within monocyte (B) M-MDSC in HD (n =  
555 43) and DLBCL (n = 69) and monocyte subset counts (classical- [cMO], intermediate-  
556 [iMO], and nonclassical- [ncMO]) in peripheral blood from HD (n = 55) and DLBCL  
557 patients (n = 91). (C) Pearson correlation between M-MDSC and monocyte (MO),  
558 cMO, iMO, and ncMO (n = 69). (D)- Mean fluorescent intensity (MFI) for CD14,  
559 CD16, and HLA-DR. Each dot represents a DLBCL sample (n = 33) colored by  
560 monocyte subset (MDSC, cMO, iMO, and ncMO). \*P < .05, \*\*P < .01, \*\*\*\*P < .0001.

561

562 **Figure 2: Circulating cMO and iMO share a common inflammatory phenotype,**

563 **in DLBCL.** (A) Hierarchical clustering of classical- (cMO) and intermediate- (iMO)  
564 monocytes, from HD (n = 4) and DLBCL (n = 7) samples. See Table S3 for a list of  
565 genes analyzed on monocyte subsets after cell sorting. Pearson's correlation and  
566 complete linkage was employed. (B) Transcripts differentially expressed (P < .05;  
567  $|\log_2FC| > 1$ ) between DLBCLs and HDs, for cMO and iMO. (C) Predicted top 5  
568 biological processes increased for cMO and iMO from DLBCL (Ingenuity Pathway  
569 Analysis, z-score > 2.5, ranked by p-value). (D) Mean fluorescence (MFI) for CD64,  
570 HLA-DR, CD163, CD14, CD16, and CCR2 for HD (n = 16) and DLBCL (n = 33)  
571 samples. \*\*P < .01, \*\*\*P < .001, ns: non significant.

572

573 **Figure 3: ncMO are decreased in peripheral blood but exhibit an inflammatory-**  
574 **and tolerogenic- phenotype.** (A) Nonclassical Slan<sup>pos</sup> or Slan<sup>neg</sup> (ncMOSlan<sup>pos</sup> and

575 ncMoSlan<sup>neg</sup>) monocytes from HDs (n = 28) and DLBCLs (n = 56). (B) Hierarchical  
576 clustering of classical- (cMO), intermediate- (iMO), nonclassical Slan<sup>pos</sup>- or Slan<sup>neg</sup>-  
577 (ncMOSlan<sup>pos</sup> and ncMoSlan<sup>neg</sup>) monocytes from DLBCL (n = 7) samples. DLBCL  
578 identity (#). List of genes analyzed on monocyte subsets after cell sorting is on Table  
579 S3. Pearson's correlation and complete linkage was employed. (C) Transcripts (P <  
580 .05;  $|\log_2FC| > 1$ ) enriched in ncMO compared to cMO and iMO for DLBCL. (D)  
581 Predicted top 5 biological processes increased for ncMO compared to cMO and iMO,  
582 from DLBCL (Ingenuity Pathway Analysis, z-score > 2.5, ranked by p-value).

583

584

585 **Figure 4: Tumor cells supernatants polarize monocytes with higher migratory**  
586 **abilities.** (A) Monocytes from healthy donors were treated with OCI-Ly supernatant  
587 (n = 2) or vehicle as control (n = 2). After CyTOF analysis, myeloid cells (12,000 to  
588 30,000) were clustered (n = 33 clusters). Mean marker intensities are shown on a  
589 heatmap for each cluster (left). Selected markers are shown for monocytes treated or  
590 not with OCI-Ly supernatant (right). (B) Migration assay for HD monocytes cultured or  
591 not with OCI-Ly3 and OCI-Ly19 supernatant in response to CCL2, CCL3, CCL5,  
592 CCL22, CXCL5, and CXCL12. (C) Phenotype comparison of tumor conditioned  
593 monocytes and myeloid cells from DLBCL tumors (n = 7) (FR-FCM-Z2CA, already  
594 published by our group).<sup>22</sup> Mean marker intensities are shown on a heatmap for each  
595 cluster. The abundance of clusters is shown as well as the enrichment in tumor-  
596 conditioned monocytes (Mo OCI-Ly) and in myeloid cells from DLBCL tumors  
597 (DLBCL).

598

599 **Figure 5: High levels of circulating ncMO is correlated to adverse prognosis in**  
600 **DLBCL.** (A) Event-free survival (EFS) in training cohorts (NCT01287923) and overall  
601 survival (OS) in validation cohorts (NCT01659099).<sup>24</sup> Patients were stratified on the  
602 ratio of ncMO to other monocytes (cMO and iMO). Threshold was defined on the  
603 training cohort using the maxstat package (Figure S8). Survival probability was  
604 calculated for both groups with a log-rank test. (B) Absolute count for ncMO  
605 (threshold at  $20.58 \times 10^6$  cells/L) and M-MDSC (threshold at  $22.51 \times 10^6$  cells/L)<sup>22</sup> and  
606 distribution of age and soluble PD-L1 (sPD-L1), \*P < .05, \*\*P < .01.



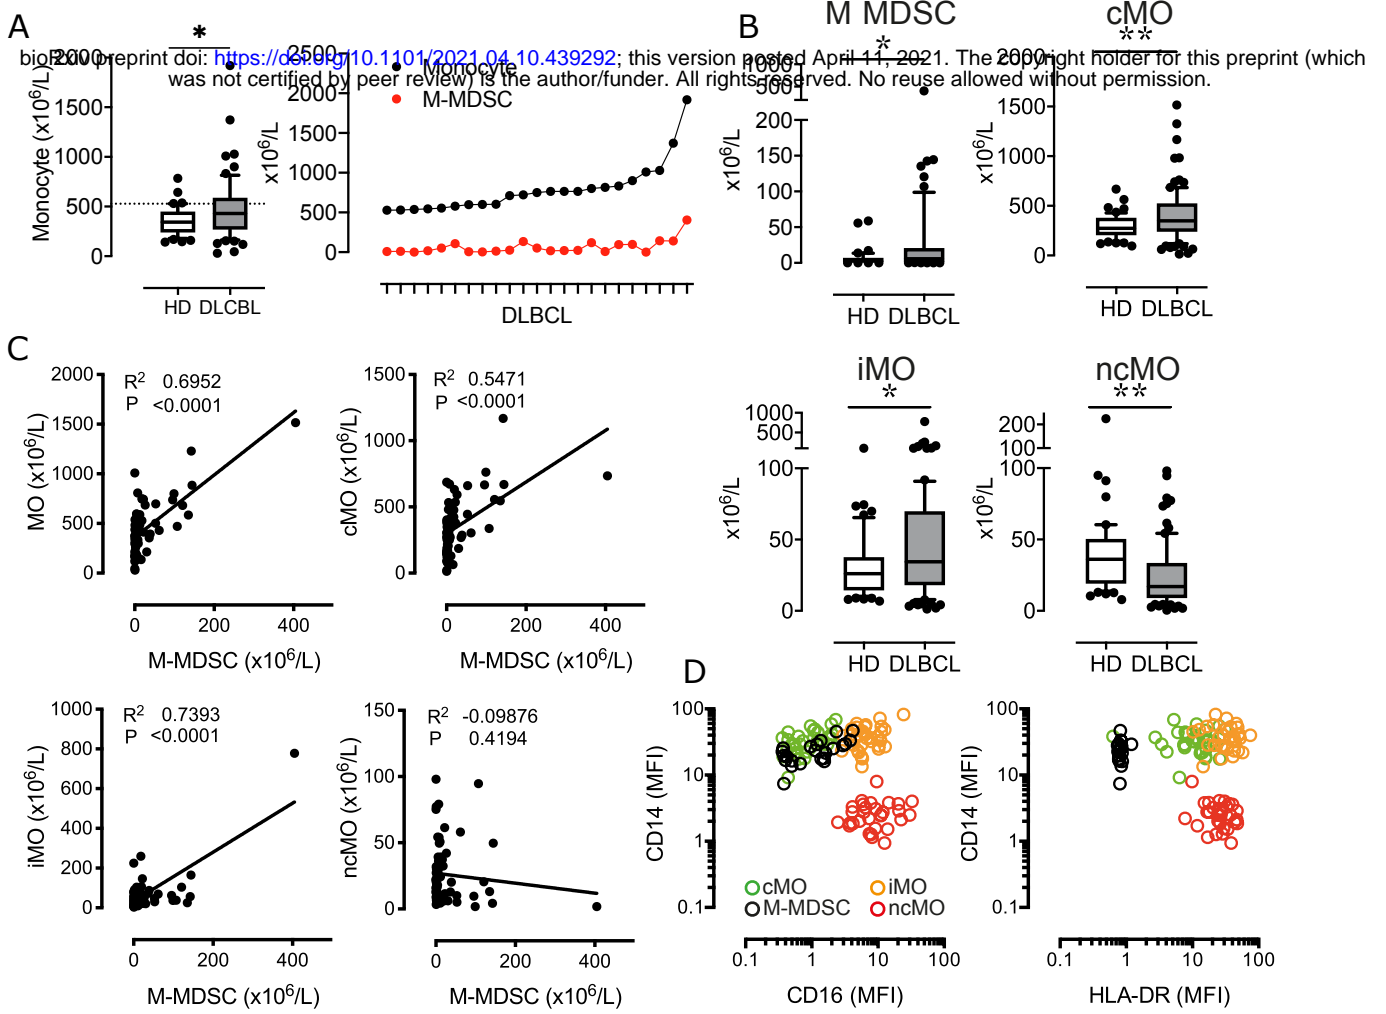

Figure 1

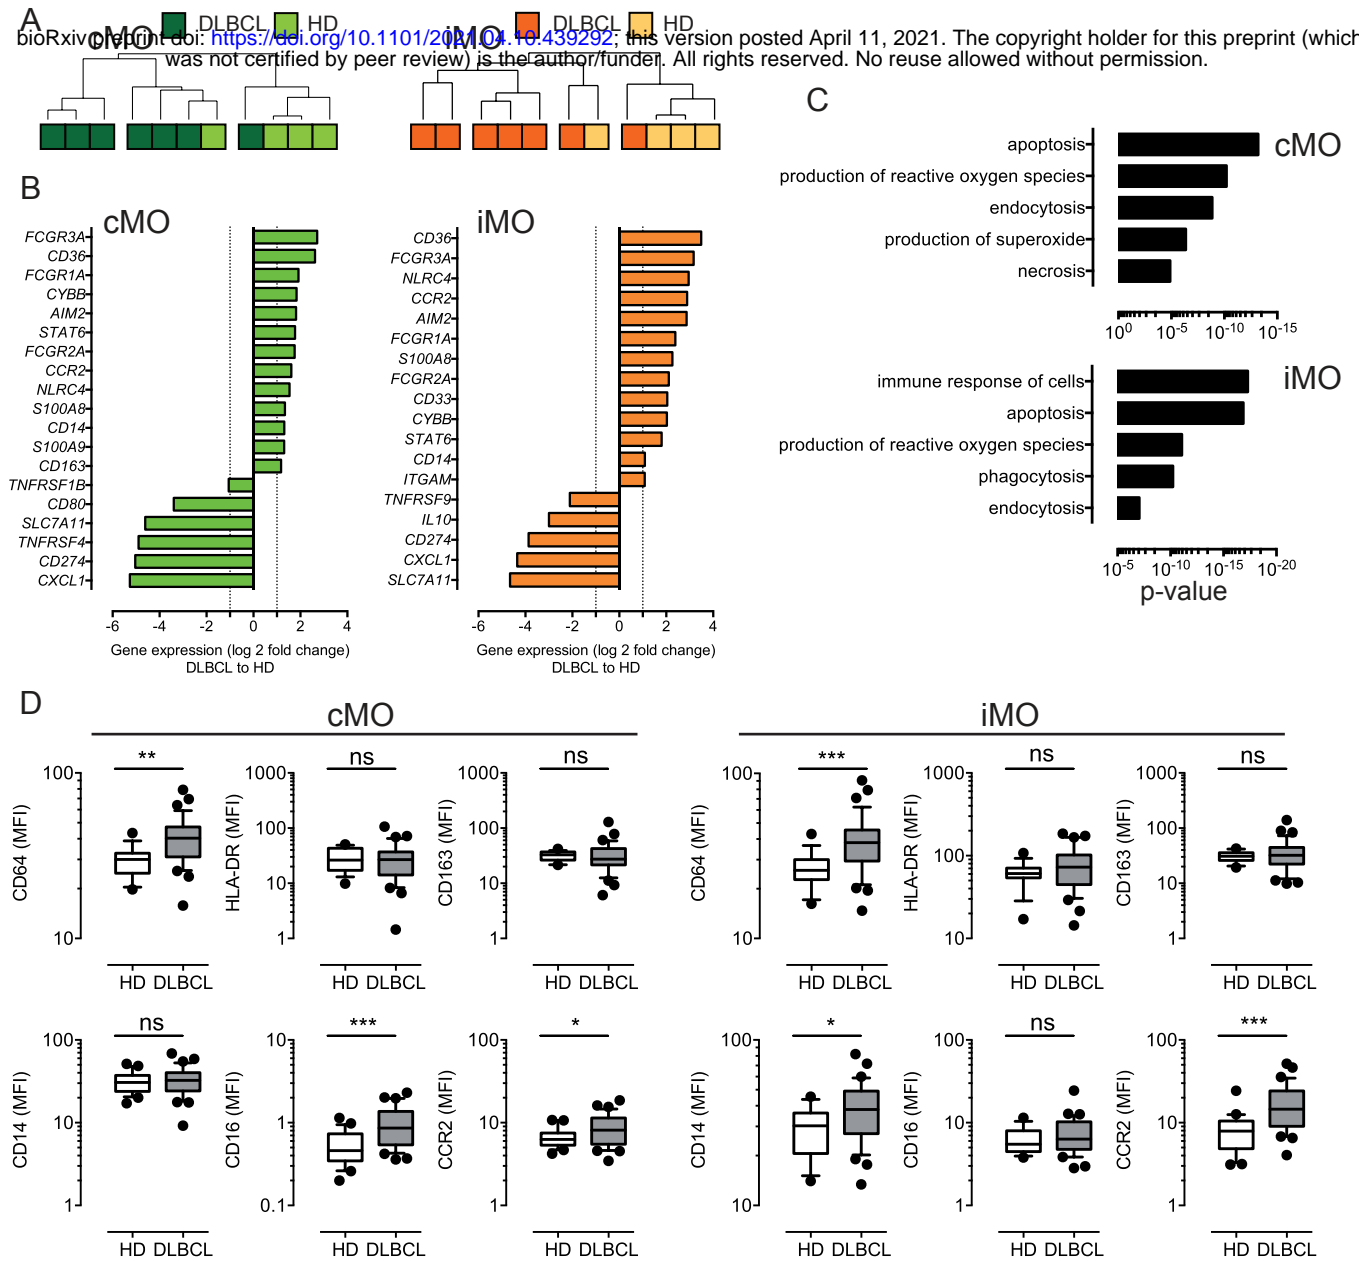

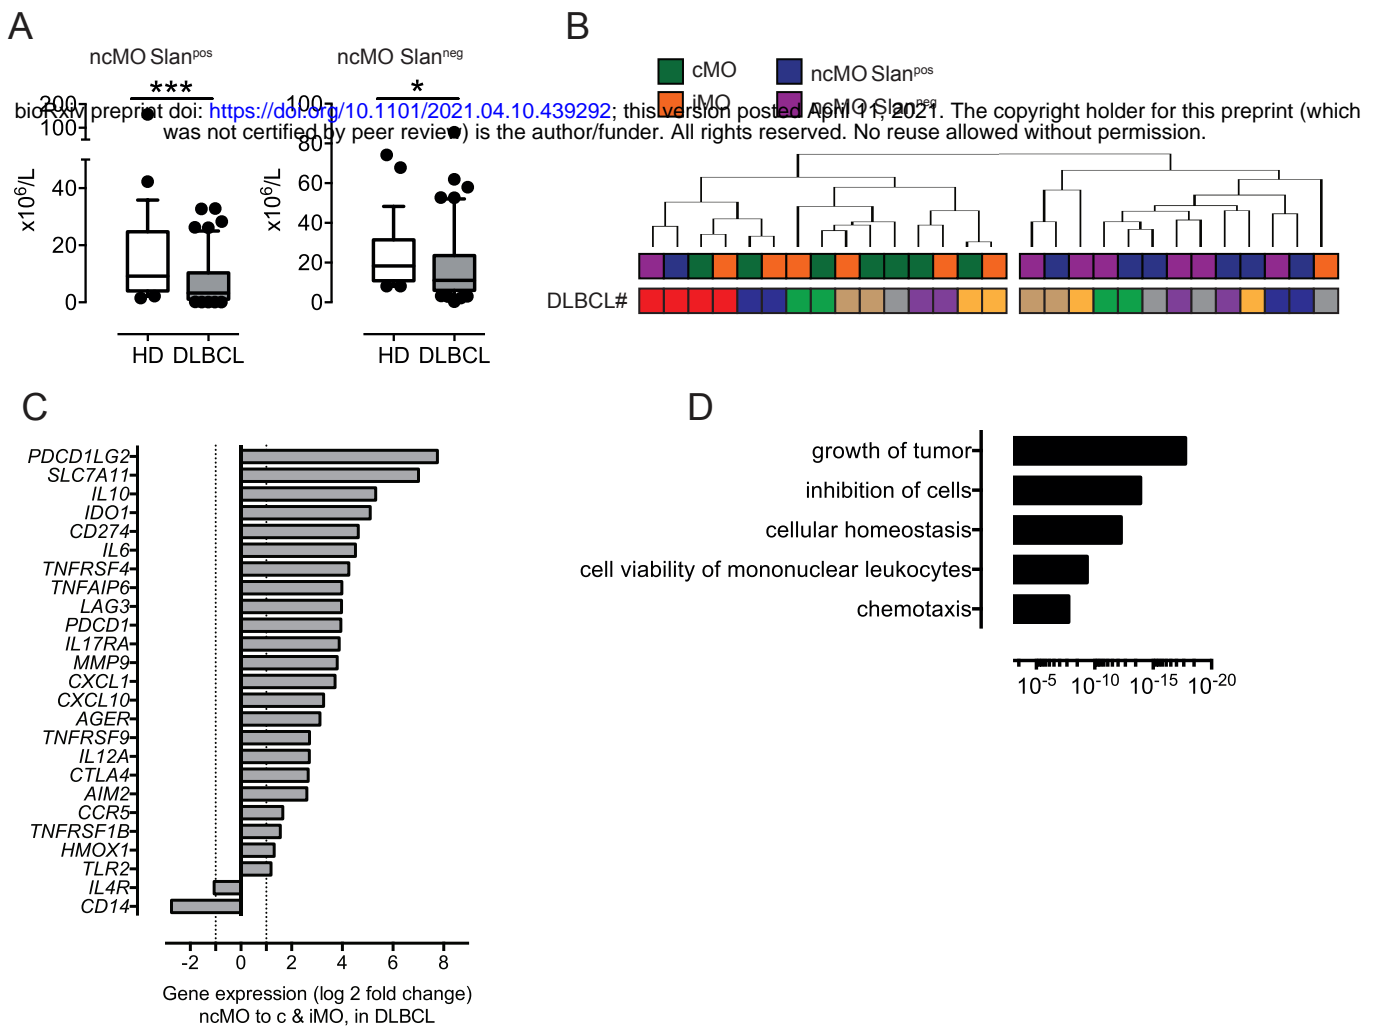

Figure 3

A

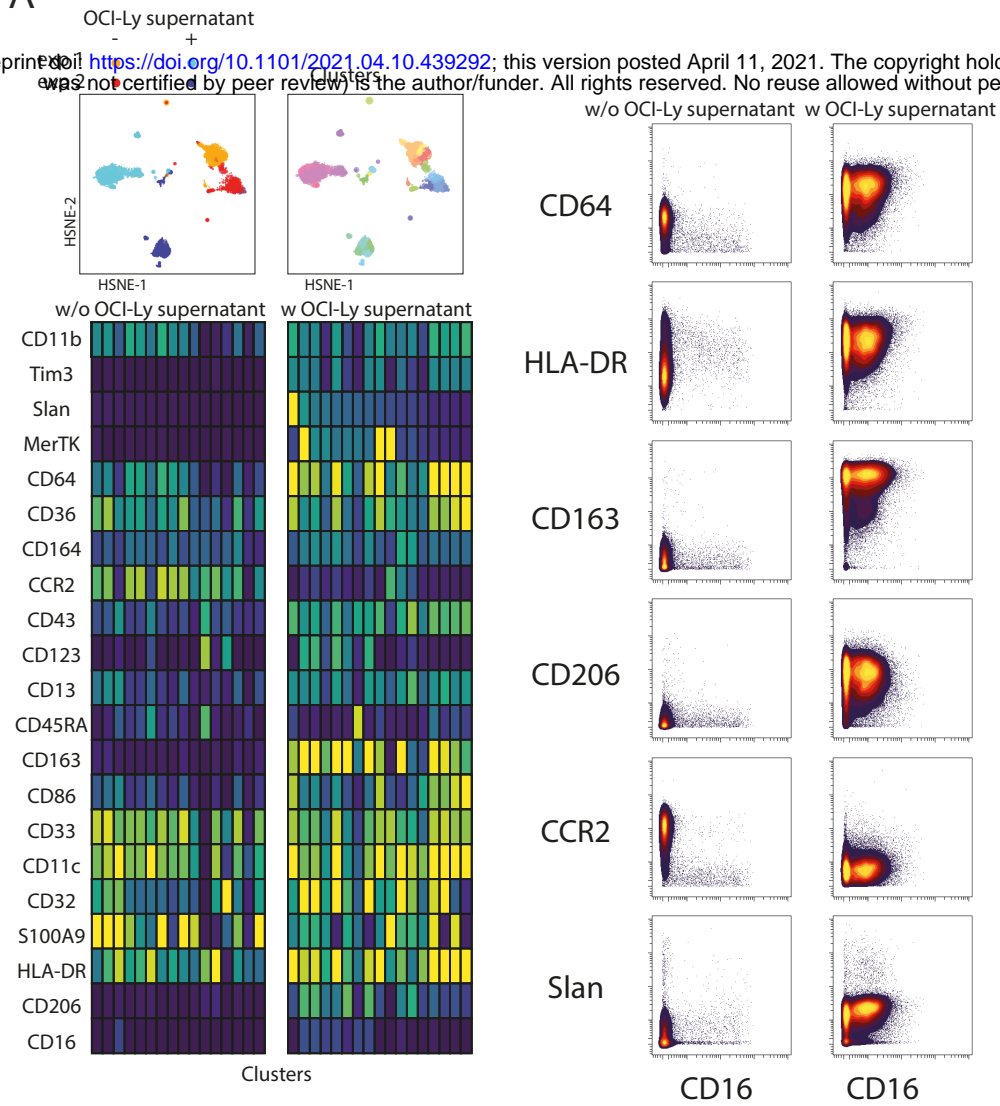

B

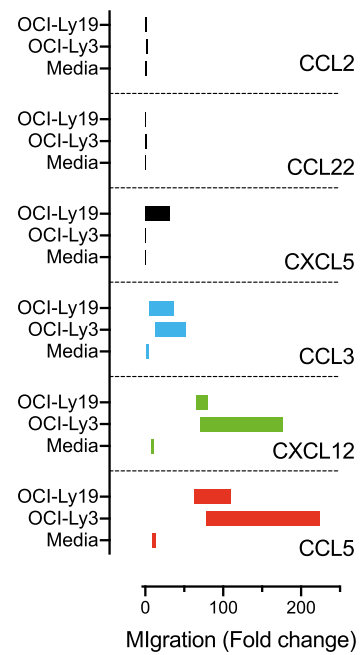

C

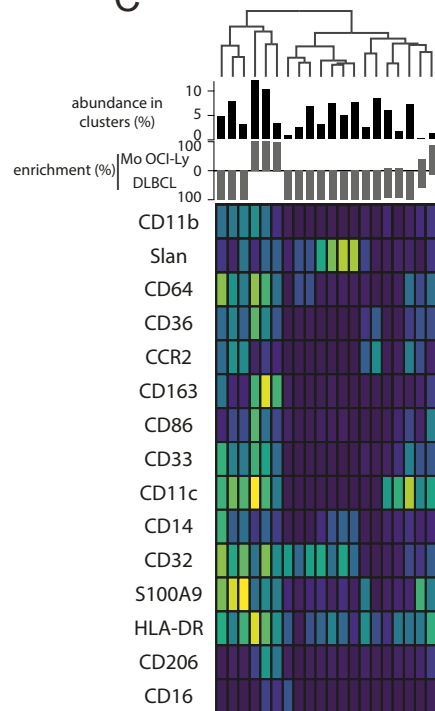

Figure 4

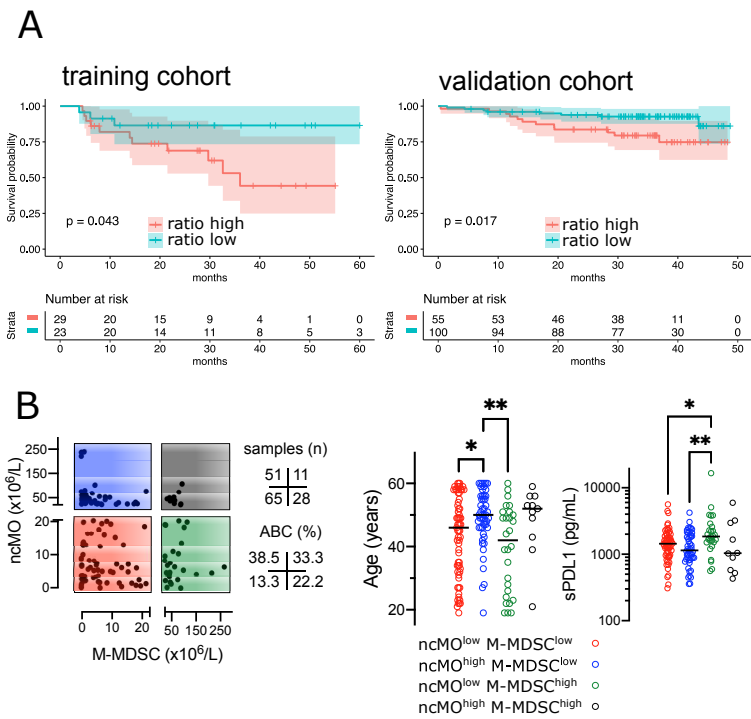

Figure 5
